# Supplementary material for: Dual-channel regulation of a single white-light-emitting compound and its application in time-dependent information encryption
Source: Royal Society of Chemistry journal article supplement (doi:10.1039/d4tc04771k), 2025-01-01
Supplement: d4tc04771k1.pdf [file d4tc04771k1.pdf]

## Supporting Information

### **Dual-channel regulation of a single white-light-emitting compound and its application in time-dependent information encryption**

Yuehua Liang,<sup>a</sup> Jiuzhi Wei,<sup>a</sup> Juan Zhang,<sup>a</sup> Tingting Zhang,<sup>a</sup> Caiyuan Guo,<sup>a</sup> Yanyan Li,<sup>a</sup> Xinxian Ma,<sup>\*a</sup> Minghua Liu,<sup>\*b</sup> and Yun Yan,<sup>\*a,c</sup>

<sup>a</sup> Ningxia Key Laboratory of Green Catalytic Materials and Technology, College of Chemistry and Chemical Engineering, Ningxia Normal University, College of Chemistry and Chemical Engineering, Ningxia Normal University, Guyuan 756099, China.

<sup>b</sup> CAS Key Laboratory of Colloid, Interface and Chemical Thermodynamics, Institute of Chemistry, Chinese Academy of Sciences, Beijing, P. R. China.

<sup>c</sup> Beijing National Laboratory for Molecular Sciences (BNLMS), College of Chemistry and Molecular Engineering, Peking University, Beijing 100871, China

#### **Corresponding Author**

\* Xinxian Ma (Email: maxinxian@163.com)

\* Minghua Liu (Email: liumh@iccas.ac.cn)

\* Yun Yan (Email: yunyan@pku.edu.cn)

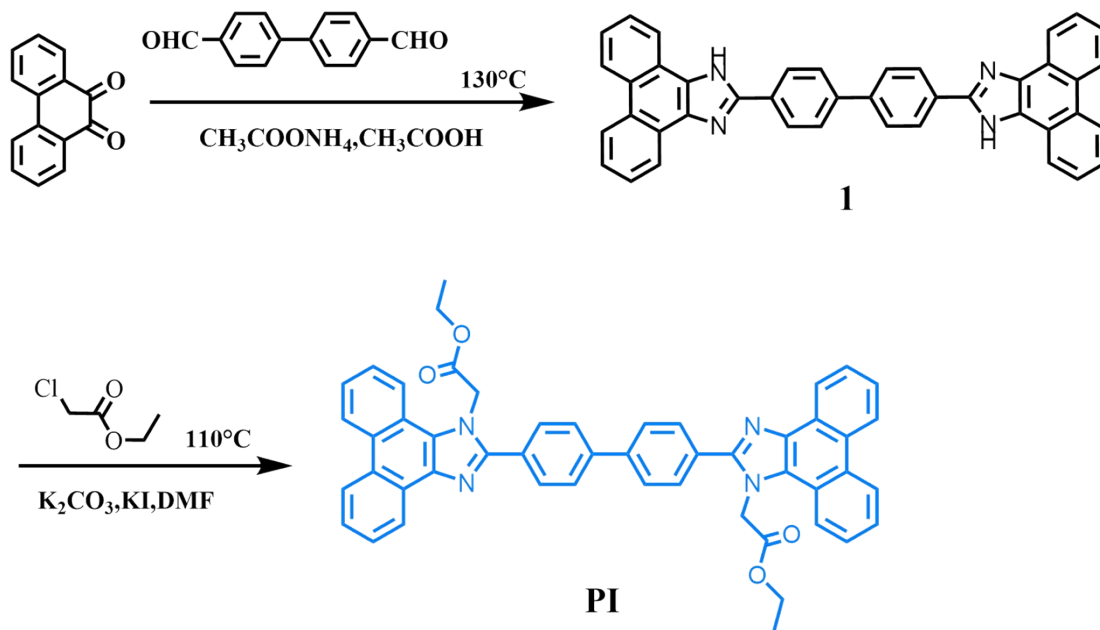

**Scheme S1.** Synthesis of PI.

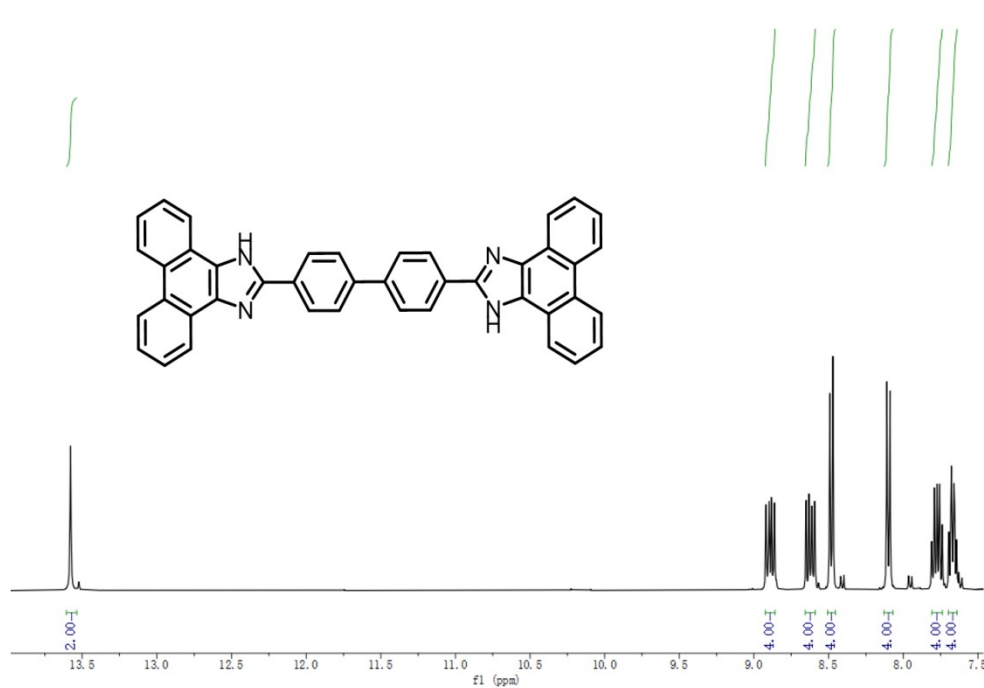

**Fig S1.**  $^1\text{H}$  NMR spectrum (400 MHz,  $\text{DMSO-}d_6$ ) of compound 1.

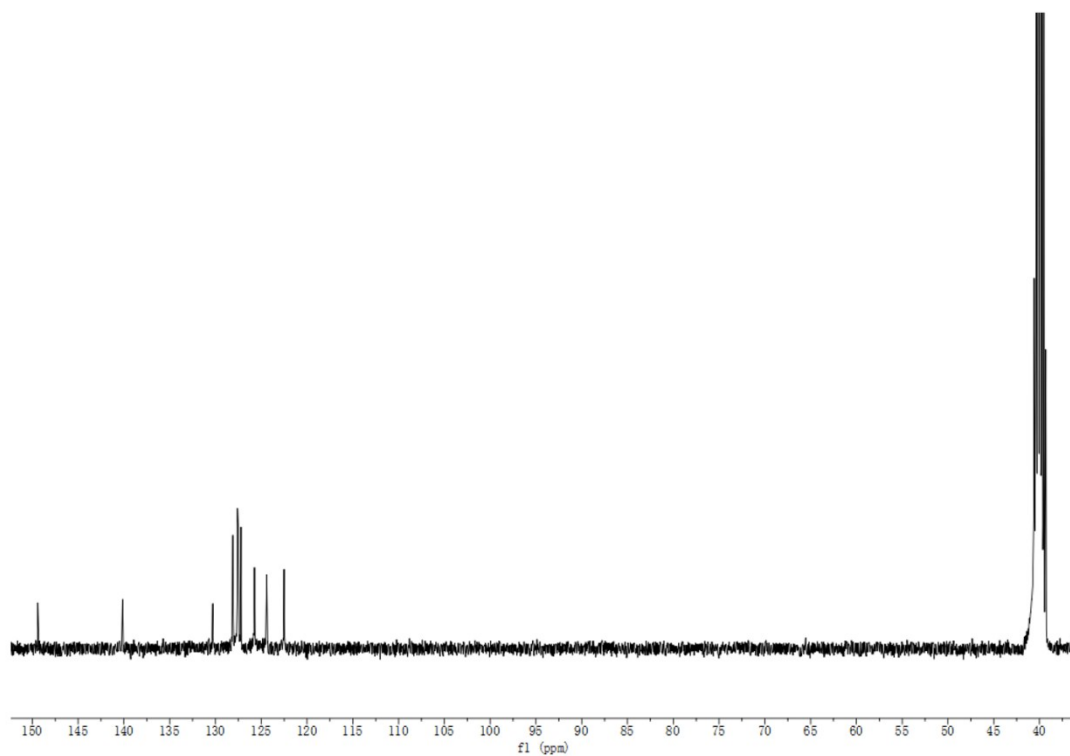

**Fig S2.**  $^{13}\text{C}$  NMR spectrum (101 MHz,  $\text{DMSO-}d_6$ ) of compound 1.

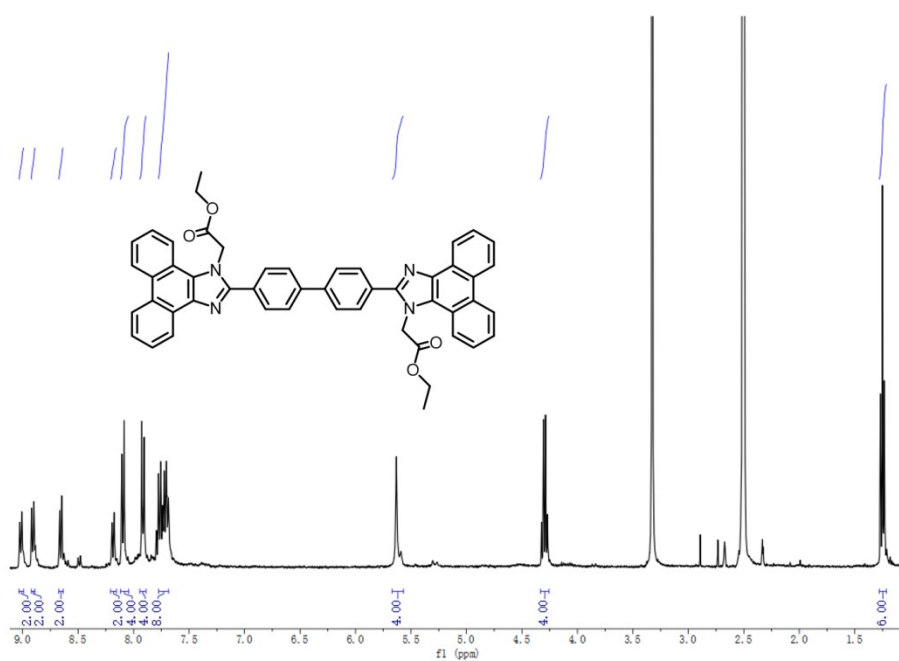

**Fig S3.**  $^1\text{H}$  NMR spectrum (400 MHz,  $\text{DMSO-}d_6$ ) of compound 1.

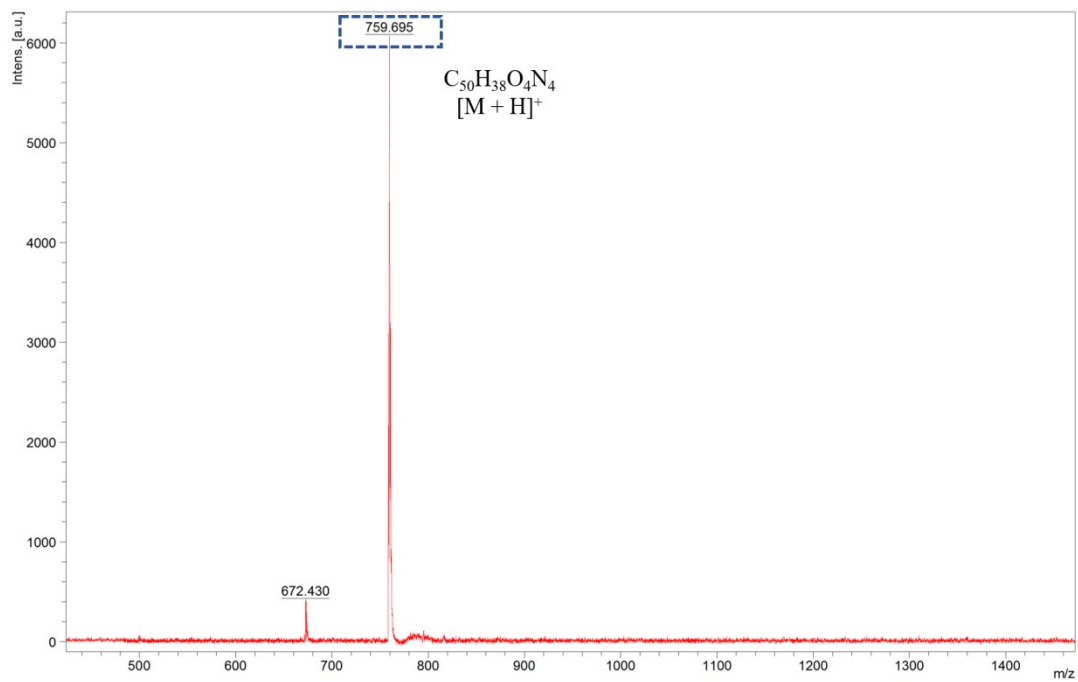

Fig S4. EI-MS spectrum of compound PI.

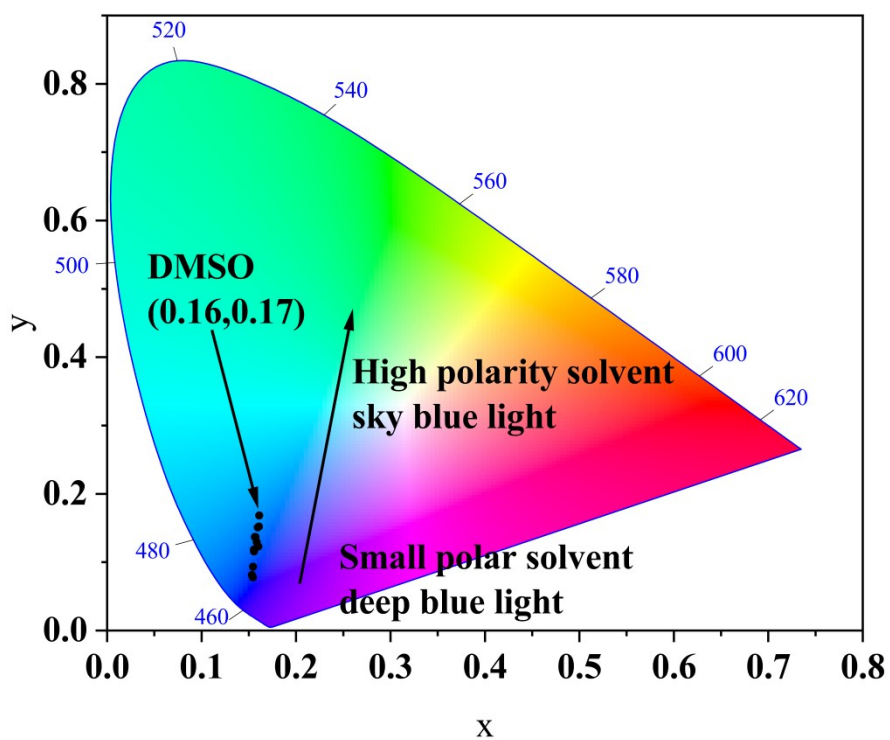

Fig S5. CIE color gamut diagram of fluorescence emitted by compound PI in different solvents.

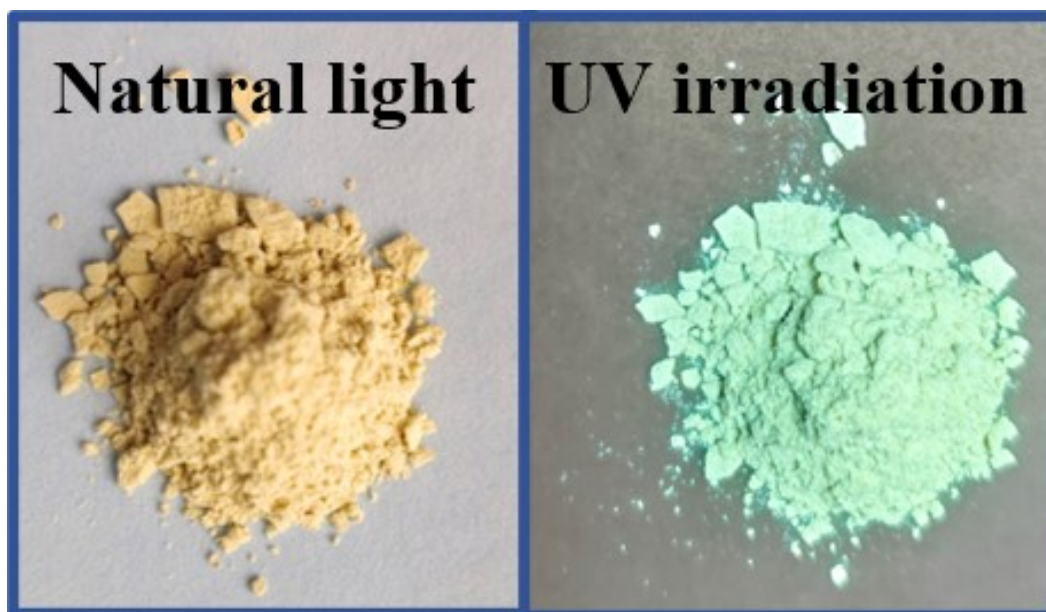

**Fig S6.** Comparison of PI solid powder under natural light and ultraviolet light irradiation.

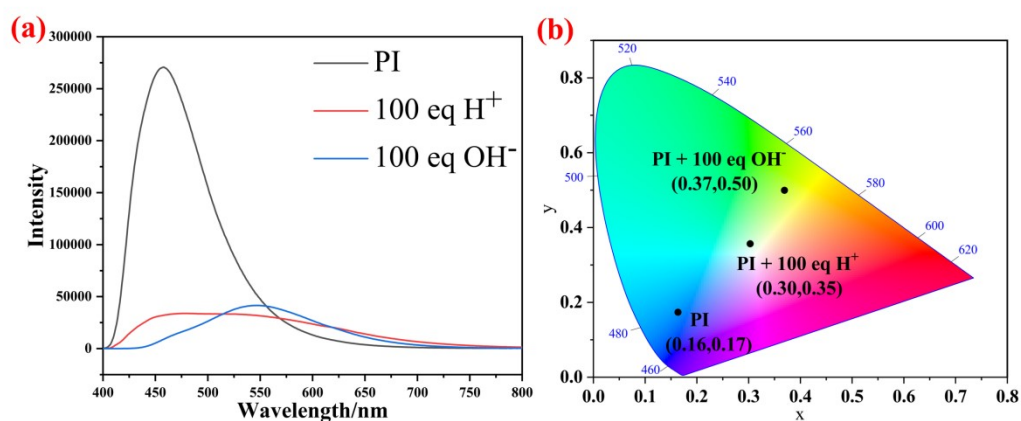

**Fig S7.** (a) Fluorescence emission spectrum changes caused by adding 100eq of  $H^+$  and  $OH^-$  to the DMSO solution of PI. (b) CIE gamut diagram corresponding to (a).

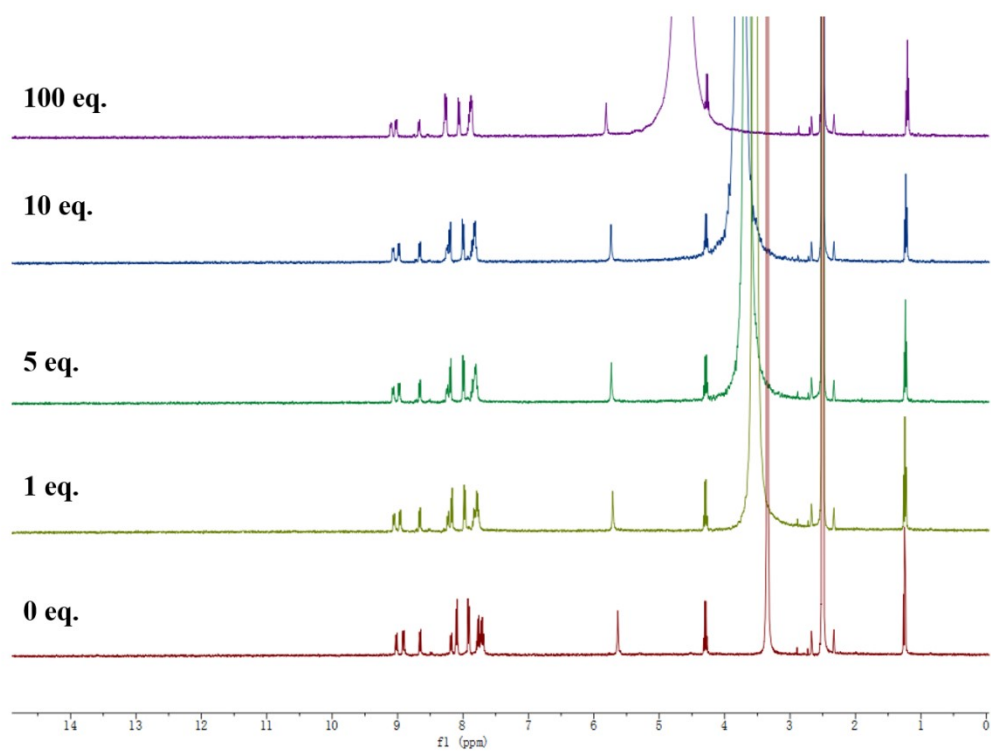

**Fig S8.** A complete  $^1\text{H}$  NMR prototyping study on PI with graded addition of  $\text{H}^+$ .

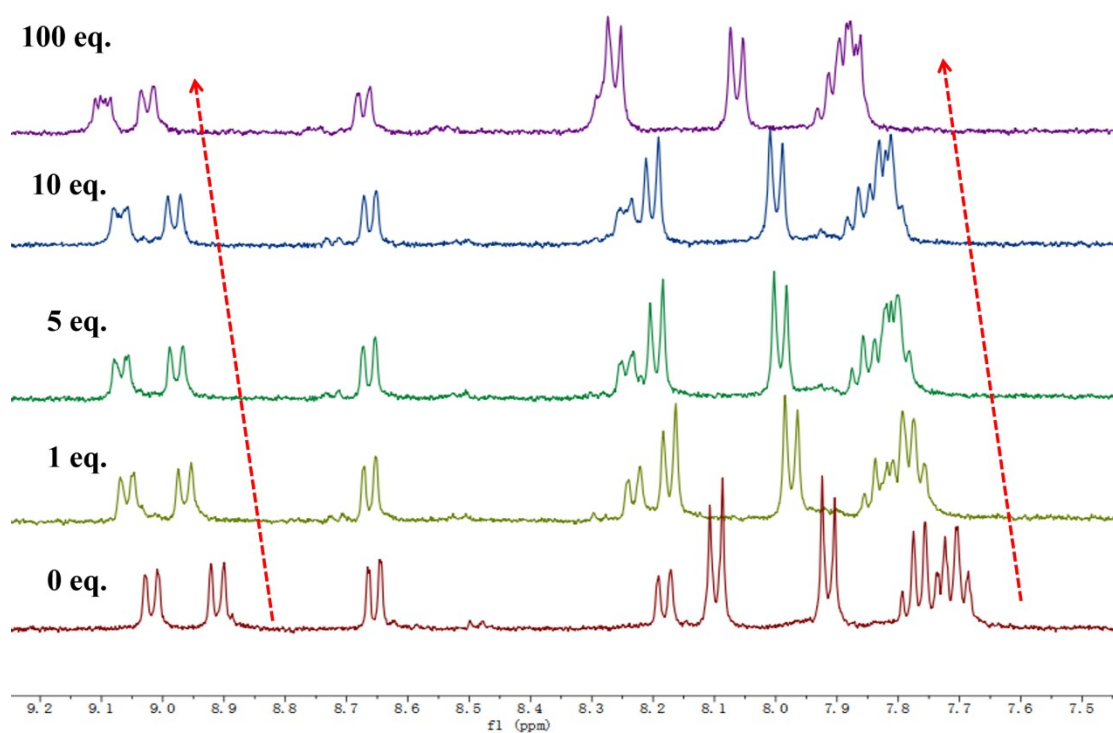

**Fig S9.** Partial magnified image of Fig S8  $^1\text{H}$  NMR.

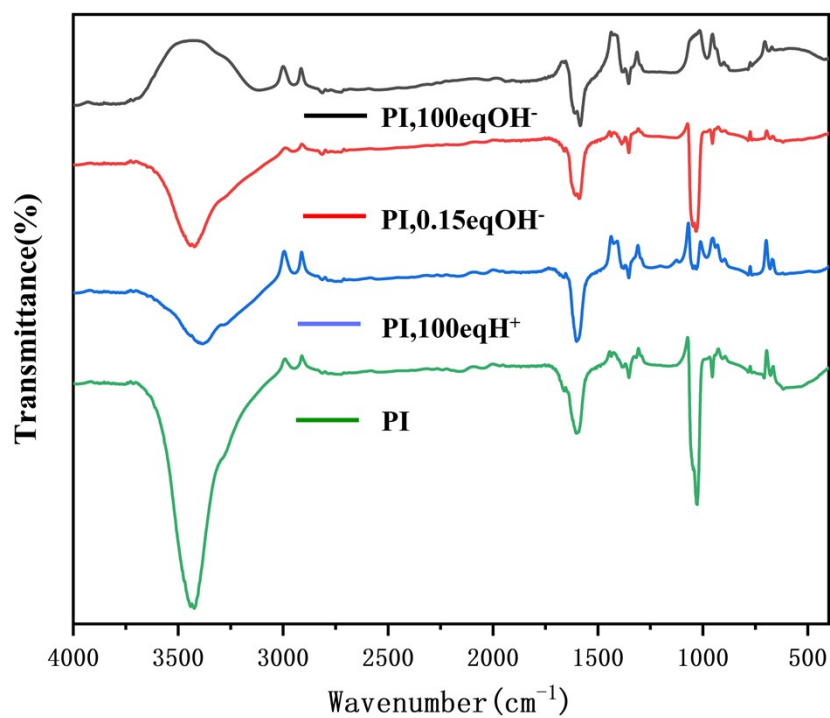

**Fig S10.** Complete FT-IR spectra of PI, PI + 100 eq of  $H^+$ , PI + 0.15 eq of  $OH^-$ , and PI + 100 eq of  $OH^-$ .

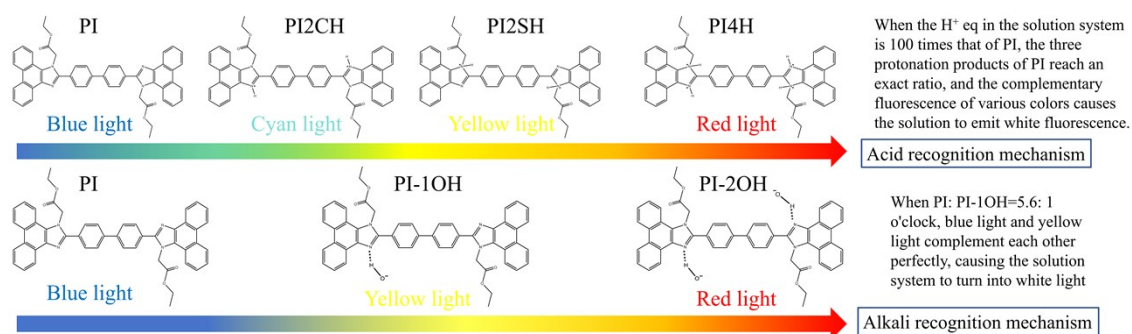

**Fig S11.** Mechanism of white light emission caused by PI and acid-base reaction.

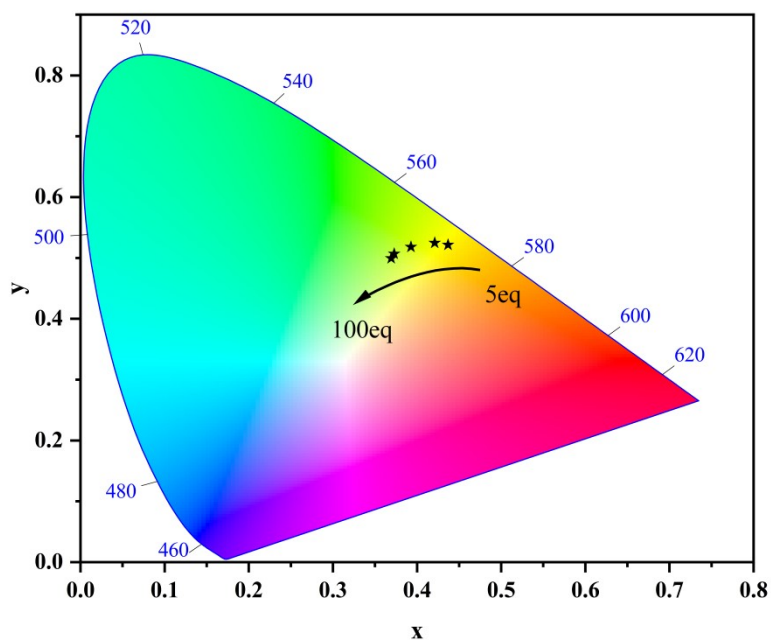

**Fig S12.** CIE colors gamut map of PI in DMSO solution under increasing  $\text{OH}^-$  concentration (5–100 eq) ( $[\text{PI}] = 1 \times 10^{-3}$  mol/L).

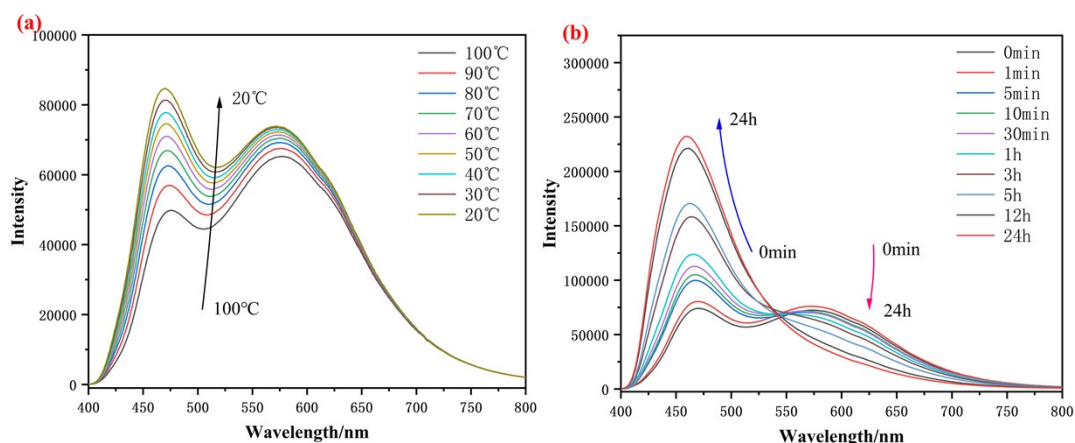

**Fig S13.** (a) The fluorescence change of PI+0.15 eq  $\text{OH}^-$  solution when heated to 100 degrees and gradually cooled to 20 degrees. (b) Fluorescence emission spectrum changes of PI+0.15 eq  $\text{OH}^-$  solution at room temperature for 24 hours.



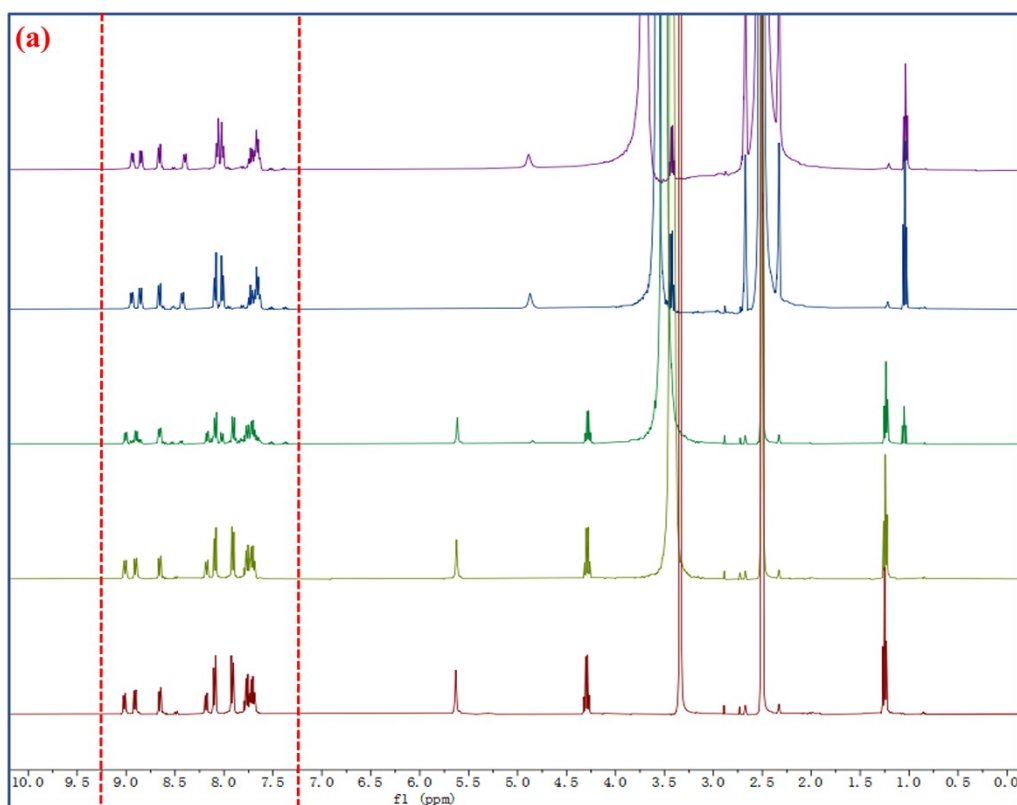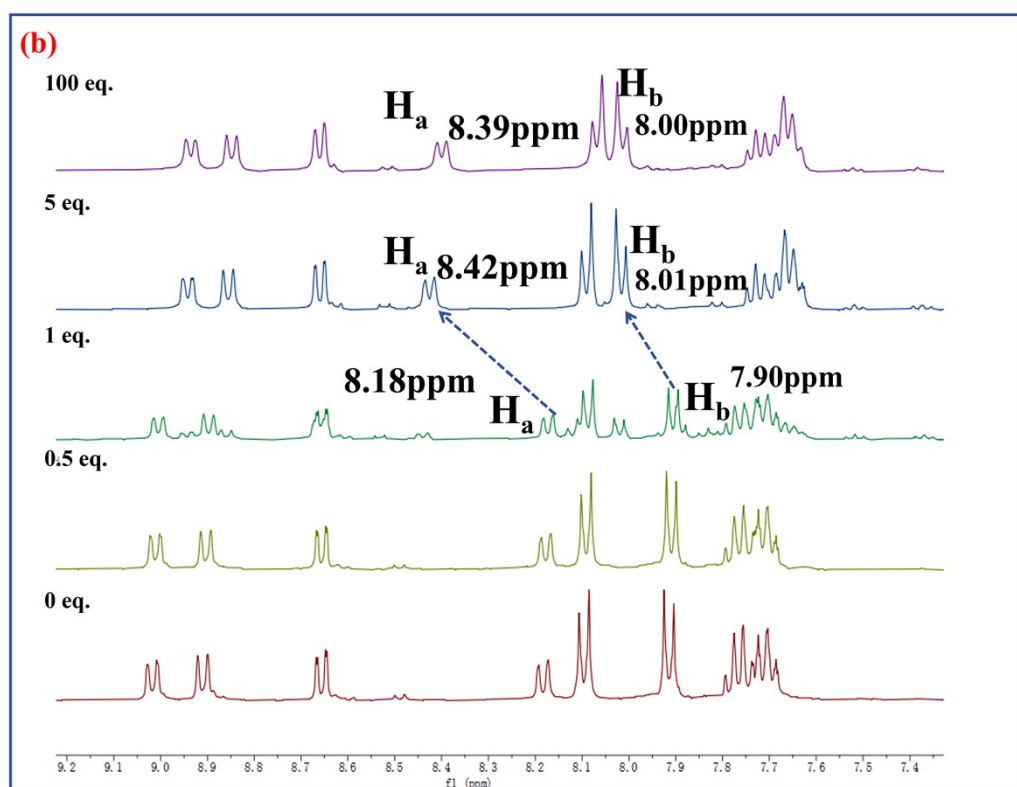

**Fig S14.** (a) A complete  $^1\text{H}$  NMR prototyping study on PI with graded addition of  $\text{OH}^-$ . (b) Enlarged image of chemical shift at 7.2ppm to 9.4ppm in Fig (a), and schematic diagram of chemical shift movement of  $\text{H}_a$  and  $\text{H}_b$  hydrogen.

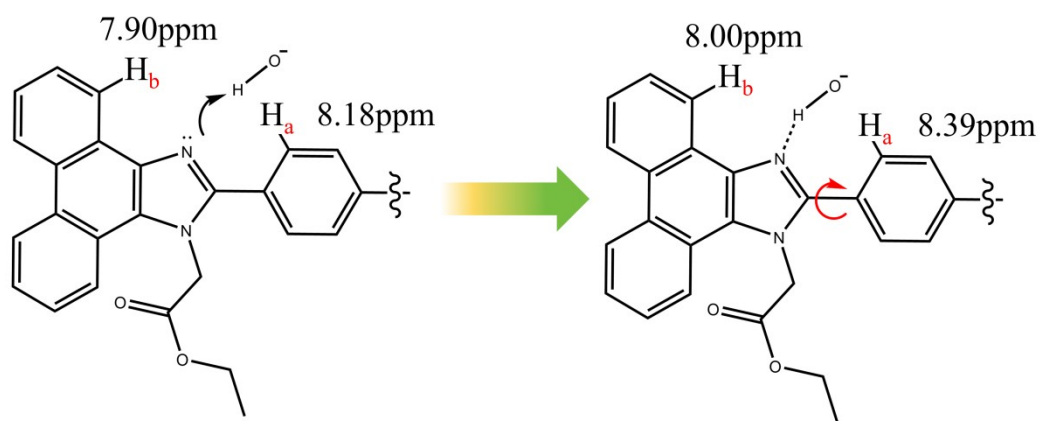

**Fig S15.** Schematic diagram of chemical shift between  $H_a$  and  $H_b$  caused by the interaction between PI and  $\text{OH}^-$ .

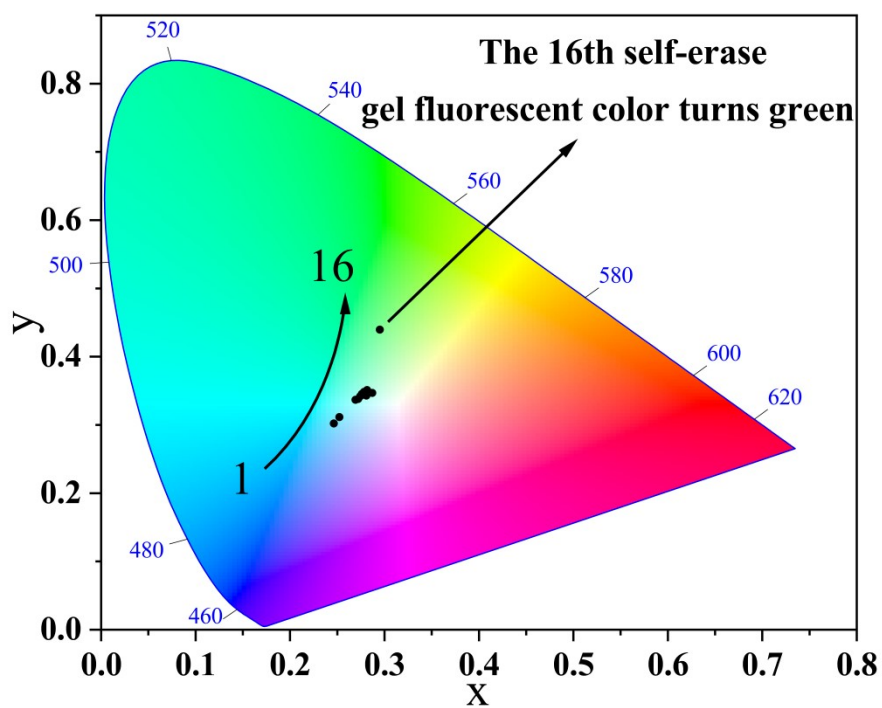

**Fig S16.** CIE color gamut changes during 16 self-erase processes of PVA/(PI+100 eq  $\text{H}^+$ ) gel.
